# Supplementary material for: Accuracy of energy and nutrient intake estimation versus observed intake using 4 technology-assisted dietary assessment methods: a randomized crossover feeding study
Source: PubMed Central journal article supplement (PMC11347807; doi:10.1016/j.ajcnut.2024.04.030), 2024-05-06

**Whitton et al. Accuracy of energy and nutrient intake estimation versus observed intake using 4 technology assisted dietary assessment methods: a randomized crossover feeding study.**

**Supplemental materials.**

**Supplemental Table 1: ACE-TADA controlled feeding study menu items**

| <b>Week 1</b>              | <b>Week 2</b>              | <b>Week 3</b>                          |
|----------------------------|----------------------------|----------------------------------------|
| <b><i>Breakfast</i></b>    |                            |                                        |
| Cornflakes                 | Cornflakes                 | Cornflakes                             |
| Weet-bix                   | Weet-bix                   | Weet-bix                               |
| Special K                  | Nutrigrain                 | Special K                              |
| Muesli, natural            | Muesli, natural            | Muesli, natural                        |
| Porridge                   | Porridge                   | Blueberries                            |
| Banana                     | Peaches                    | Yoghurt, plain, Greek                  |
| Peaches                    | Banana                     | Yoghurt, flavoured                     |
| Blueberries                | Blueberries                | Toast, fruit bread                     |
| Strawberries               | Strawberries               | Toast, ciabatta                        |
| Yoghurt, plain, Greek      | Yoghurt, plain, Greek      | Toast, multigrain or white             |
| Yoghurt, flavoured         | Yoghurt, flavoured         | Jam or marmalade                       |
| Fruit bread                | Toast, fruit bread         | Honey                                  |
| Toast, ciabatta            | Toast, ciabatta            | Peanut paste                           |
| Toast, multigrain or white | Toast, multigrain or white | Vegemite                               |
| Jam                        | Jam                        | Butter                                 |
| Marmalade                  | Marmalade                  | Margarine                              |
| Honey                      | Honey                      | Avocado                                |
| Peanut paste               | Peanut paste               | Eggs, poached                          |
| Vegemite                   | Vegemite                   | Grilled tomato                         |
| Butter                     | Butter                     | Grilled mushroom                       |
| Margarine                  | Margarine                  | Dressing, balsamic                     |
| Avocado                    | Avocado                    | Toasted English muffin, cheese         |
| Lemon                      | Lemon                      | Toasted English muffin, ham and cheese |
| Eggs, poached              | Eggs, poached              | Orange juice                           |
| Ham and cheese melts       | Ham and cheese melts       | Apple juice                            |
| Cheese melt                | Cheese melt                | Hot tea (tea bag)                      |
| Blueberry muffin           | Water                      | Coffee (espresso, instant)             |
| Water, still               | Water, sparkling           | Coffee, flat white                     |
| Water, sparkling           | Orange juice               | Choc milk                              |
| Orange juice               | Apple juice                | Iced coffee                            |
| Apple juice                | Hot tea (tea bag)          | Milk, 2% fat                           |
| Hot tea (tea bag)          | Tea herbal                 | Milk, skim                             |
| Tea herbal                 | Coffee (espresso, instant) | Soy milk, regular                      |
| Coffee (espresso, instant) | Coffee, flat white         | Soy milk, lite                         |
| Coffee, flat white         | Choc milk                  | Sugar                                  |
| Milk, 2% fat               | Milk, 2% fat               |                                        |
| Milk, skim                 | Milk, skim                 |                                        |
| Milk, regular              | Milk, regular              |                                        |
| Soy milk, regular          | Soy milk, regular          |                                        |
| Soy milk, lite             | Soy milk, lite             |                                        |

Milk, lactose-free  
Artificial sweetener  
Sugar  
Almond milk

Milk, lactose-free  
Artificial sweetener  
Sugar

### Lunch

Vegetarian sushi  
Chicken sushi  
Smoked salmon sushi  
Chicken rice paper roll  
Tofu rice paper roll  
Pickled ginger  
Wasabi  
Soy sauce  
Continental roll, chicken  
Continental roll, ham  
Toasted sandwich, ham, cheese & tomato  
Toasted sandwich, cheese  
Vietnamese salad, chicken  
Vietnamese salad, vegan, tofu  
Fruit salad  
Choc chip cookie  
Water, still  
Water, sparkling  
Orange juice  
Apple juice  
Diet coke  
Coke zero  
Coke  
Ginger beer  
Lemonade  
Lemonade, diet  
Lemon squash  
Coffee (espresso, instant)  
Coffee, flat white  
Hot tea (tea bag)  
Tea, herbal  
Milk, 2% fat  
Milk, skim  
Milk, regular  
Soy milk, regular  
Soy milk, lite  
Milk, lactose-free  
Artificial sweetener  
Sugar  
Almond milk

Vegetarian sushi  
Chicken sushi  
Smoked salmon sushi  
Chicken rice paper roll  
Tofu rice paper roll  
Pickled ginger  
Wasabi  
Soy sauce  
Wrap, salad with chicken  
Wrap, to add cheese only  
Wrap, salad with ham  
Wrap, to add avocado only  
Wrap, salad, cheese, avocado  
Toasted sandwich, ham, cheese & tomato  
Toasted sandwich, cheese  
Chicken and corn soup  
Greek salad  
Dressing  
Fruit salad  
Carrot cake  
Water, still  
Water, sparkling  
Orange juice  
Apple juice  
Diet coke  
Water, sparkling  
Orange juice  
Apple juice  
Diet coke  
Coke zero  
Coke  
Ginger beer  
Lemon squash  
Lemonade  
Lemonade, diet  
Coffee (espresso, instant)  
Coffee, flat white  
Hot tea (tea bag)  
Lemon squash  
Lemonade  
Lemonade, diet  
Coffee (espresso, instant)  
Coffee, flat white  
Hot tea (tea bag)  
Milk, 2% fat  
Milk, skim  
Milk, regular  
Soy milk, regular  
Soy milk, lite  
Milk, lactose-free  
Artificial sweetener  
Sugar  
Tea, herbal

Vegetarian sushi  
Chicken sushi  
Smoked salmon sushi  
Chicken rice paper roll  
Tofu rice paper roll  
Pickled ginger  
Wasabi  
Soy sauce  
Wrap, salad, cheese, avocado  
Wrap, salad, cheese, chicken  
Wrap, salad, cheese, ham  
Chicken salad, Thai style  
Fruit salad  
Chocolate brownie  
Water, still  
Water, sparkling  
Orange juice  
Apple juice  
Diet coke  
Coke zero  
Coke  
Ginger beer  
Lemon squash  
Lemonade  
Lemonade, diet  
Coffee (espresso, instant)  
Coffee, flat white  
Hot tea (tea bag)  
Milk, 2% fat  
Milk, skim  
Soy milk, regular  
Soy milk, lite  
Artificial sweetener  
Dressing  
Sugar

---

## *Dinner*

---

|                            |                                 |                                      |
|----------------------------|---------------------------------|--------------------------------------|
| Chicken satay with rice    | Thai green curry                | Chicken and vegetable curry and rice |
| Vegetarian lasagna         | Rice                            | Cannelloni, spinach and ricotta      |
| Beef lasagna               | Cannelloni, spinach and ricotta | Spaghetti bolognese                  |
| Vegan rice                 | Tortellini, beef                | Pizza, supreme                       |
| Teriyaki chicken noodles   | Vegan fried rice                | Roast chicken                        |
| Roast chicken              | Vermicelli noodles with beef    | Roast beef                           |
| Gravy                      | Roast chicken                   | Gravy                                |
| Steamed vegetables         | Gravy                           | Garden salad                         |
| Baked potato               | Quiche Lorraine                 | Greek salad                          |
| Green salad                | Vegetable quiche                | Dressing                             |
| Dressing                   | Green salad                     | Fruit salad                          |
| Fruit salad                | Dressing                        | Ice cream stick, drumstick           |
| Lions fruit cake           | Steamed vegetables              | Ice cream stick, Magnum              |
| Ice cream stick, drumstick | Baked potato                    | Water, still                         |
| Ice cream stick, Magnum    | Fruit salad                     | Water, sparkling                     |
| Choc chip cookie           | Lions fruit cake                | Orange juice                         |
| Water, still               | Ice cream stick, drumstick      | Apple juice                          |
| Water, sparkling           | Ice cream stick, Magnum         | Diet coke                            |
| Orange juice               | Water, still                    | Coke zero                            |
| Apple juice                | Water, sparkling                | Coke                                 |
| Diet coke                  | Orange juice                    | Ginger beer                          |
| Coke zero                  | Apple juice                     | Lemonade                             |
| Coke                       | Diet coke                       | Lemonade, diet                       |
| Ginger beer                | Coke zero                       | Lemon squash                         |
| Lemonade                   | Coke                            | Cheddar cheese, grated               |
| Lemonade, diet             | Ginger beer                     |                                      |
| Lemon squash               | Lemonade                        |                                      |
|                            | Lemonade, diet                  |                                      |
|                            | Lemon squash                    |                                      |

---

**Supplemental Table 2.** Protocol for an image-assisted interviewer-administered 24hr dietary recall interview, conducted remotely via a video call. The interview structure is based on the Automated Multiple Pass Method (AMPM) developed by the USDA with adaptations outlined in the table.

| AMPM                                                                                                                                                                                                                                                          | Image-assisted mFR24             | Adaptions                                                                                                                                                                | When image not taken follow the AMPM script                                            |
|---------------------------------------------------------------------------------------------------------------------------------------------------------------------------------------------------------------------------------------------------------------|----------------------------------|--------------------------------------------------------------------------------------------------------------------------------------------------------------------------|----------------------------------------------------------------------------------------|
| <p><b>1. Quick List:</b><br/>Aim: The purpose of the QL pass is to get a quick report of foods and beverages consumed in the past 24 hours without interrupting the respondent and also to introduce the respondent to the concept of the 24 hour recall.</p> | 1. Quick List                    | Taken from the mini label list provided by the participant.                                                                                                              |                                                                                        |
| <p><b>2. Forgotten foods and additions</b><br/>Aim: The FFL prompts the respondent's memory and collects other food or beverages the respondent did not report in the QL.</p>                                                                                 | 2. Forgotten foods and additions | After detail cycle, before final probe                                                                                                                                   | Read out commonly forgotten foods list                                                 |
| <p><b>3. Time and Occasion</b><br/>Aim: The 'time and occasion' of food or beverages consumed are recorded.</p>                                                                                                                                               | 3. Time and Occasion             | Does not require a separate pass. Time of eating taken from the image metadata.                                                                                          | Ask participant to recall "time and occasion" of forgotten foods when item is reported |
| <p><b>4. Detail cycle</b><br/>Aim: to collect specific descriptive information about each food and beverage reported and also record quantities and any additions made to the foods.</p>                                                                      | 4. Detail cycle                  | <p>Clarify only non-identifiable food and beverage items</p> <p>Follow the food model booklet to confirm amounts consumed</p> <p>Check the after-image for leftovers</p> | Follow the food model booklet to confirm amounts consumed                              |
| <p><b>5. Final Probe</b><br/>Aim: is the last opportunity for the respondent to remember any new foods and drinks</p>                                                                                                                                         | 5. Final Probe                   |                                                                                                                                                                          | Read out the list of food and beverage items                                           |

**Supplemental Table 3.** STROBE-nut: An extension of the STROBE statement for nutritional epidemiology.

Lachat C et al. (2016) STrengthening the Reporting of OBservational studies in Epidemiology – Nutritional Epidemiology (STROBE-nut): an extension of the STROBE statement. Plos Medicine 13(6) <http://dx.doi.org/10.1371/journal.pmed.1002036> [pdf](#) or [online](#) version.

| Item                      | Item nr | STROBE recommendations                                                                                                                                                                              | Extension for Nutritional Epidemiology studies (STROBE-nut)                                                                                                    | Reported on page # |
|---------------------------|---------|-----------------------------------------------------------------------------------------------------------------------------------------------------------------------------------------------------|----------------------------------------------------------------------------------------------------------------------------------------------------------------|--------------------|
| <b>Title and abstract</b> | 1       | (a) Indicate the study’s design with a commonly used term in the title or the abstract.<br><br>(b) Provide in the abstract an informative and balanced summary of what was done and what was found. | <b>nut-1</b> State the dietary/nutritional assessment method(s) used in the title, abstract, or keywords.                                                      | 1                  |
| <b>Introduction</b>       |         |                                                                                                                                                                                                     |                                                                                                                                                                |                    |
| Background rationale      | 2       | Explain the scientific background and rationale for the investigation being reported.                                                                                                               |                                                                                                                                                                | 6-10               |
| Objectives                | 3       | State specific objectives, including any pre-specified hypotheses.                                                                                                                                  |                                                                                                                                                                | 10                 |
| <b>Methods</b>            |         |                                                                                                                                                                                                     |                                                                                                                                                                |                    |
| Study design              | 4       | Present key elements of study design early in the paper.                                                                                                                                            |                                                                                                                                                                | 12                 |
| Settings                  | 5       | Describe the setting, locations, and relevant dates, including periods of recruitment, exposure, follow-up, and data collection.                                                                    | <b>nut-5</b> Describe any characteristics of the study settings that might affect the dietary intake or nutritional status of the participants, if applicable. | 11-12              |

| Item         | Item nr | STROBE recommendations                                                                                                                                                                                                                                                                                                                                                                                                                                                                                                                                                                                                                                                              | Extension for Nutritional Epidemiology studies (STROBE-nut)                                                                                                                                                                       | Reported on page # |
|--------------|---------|-------------------------------------------------------------------------------------------------------------------------------------------------------------------------------------------------------------------------------------------------------------------------------------------------------------------------------------------------------------------------------------------------------------------------------------------------------------------------------------------------------------------------------------------------------------------------------------------------------------------------------------------------------------------------------------|-----------------------------------------------------------------------------------------------------------------------------------------------------------------------------------------------------------------------------------|--------------------|
| Participants | 6       | <p>a) Cohort study—Give the eligibility criteria, and the sources and methods of selection of participants. Describe methods of follow-up.</p> <p>Case-control study—Give the eligibility criteria, and the sources and methods of case ascertainment and control selection. Give the rationale for the choice of cases and controls.</p> <p>Cross-sectional study—Give the eligibility criteria, and the sources and methods of selection of participants.</p> <p>(b) Cohort study—For matched studies, give matching criteria and number of exposed and unexposed.</p> <p>Case-control study—For matched studies, give matching criteria and the number of controls per case.</p> | <b>nut-6</b> Report particular dietary, physiological or nutritional characteristics that were considered when selecting the target population.                                                                                   | 11-12              |
| Variables    | 7       | Clearly define all outcomes, exposures, predictors, potential confounders, and effect modifiers. Give diagnostic criteria, if applicable.                                                                                                                                                                                                                                                                                                                                                                                                                                                                                                                                           | <p><b>nut-7.1</b> Clearly define foods, food groups, nutrients, or other food components.</p> <p><b>nut-7.2</b> When using dietary patterns or indices, describe the methods to obtain them and their nutritional properties.</p> | 23-24              |

| Item                        | Item nr | STROBE recommendations                                                                                                                                                                | Extension for Nutritional Epidemiology studies (STROBE-nut)                                                                                                                                                                                                                                                                                                                                                                                                                                                                                                                                                                                                                                                                                                                                                                                                                                                                                                                                                                                                                                            | Reported on page # |
|-----------------------------|---------|---------------------------------------------------------------------------------------------------------------------------------------------------------------------------------------|--------------------------------------------------------------------------------------------------------------------------------------------------------------------------------------------------------------------------------------------------------------------------------------------------------------------------------------------------------------------------------------------------------------------------------------------------------------------------------------------------------------------------------------------------------------------------------------------------------------------------------------------------------------------------------------------------------------------------------------------------------------------------------------------------------------------------------------------------------------------------------------------------------------------------------------------------------------------------------------------------------------------------------------------------------------------------------------------------------|--------------------|
| Data sources - measurements | 8       | For each variable of interest, give sources of data and details of methods of assessment (measurement). Describe comparability of assessment methods if there is more than one group. | <p><b>nut-8.1</b> Describe the dietary assessment method(s), e.g., portion size estimation, number of days and items recorded, how it was developed and administered, and how quality was assured. Report if and how supplement intake was assessed.</p> <p><b>nut-8.2</b> Describe and justify food composition data used. Explain the procedure to match food composition with consumption data. Describe the use of conversion factors, if applicable.</p> <p><b>nut-8.3</b> Describe the nutrient requirements, recommendations, or dietary guidelines and the evaluation approach used to compare intake with the dietary reference values, if applicable.</p> <p><b>nut-8.4</b> When using nutritional biomarkers, additionally use the STROBE Extension for Molecular Epidemiology (STROBE-ME). Report the type of biomarkers used and their usefulness as dietary exposure markers.</p> <p><b>nut-8.5</b> Describe the assessment of nondietary data (e.g., nutritional status and influencing factors) and timing of the assessment of these variables in relation to dietary assessment.</p> | 15-21              |

| Item                   | Item nr | STROBE recommendations                                                                                                                                                                                                                                                                                                                                                                                              | Extension for Nutritional Epidemiology studies (STROBE-nut)                                                                                                                                                                                                                                                                                                                      | Reported on page # |
|------------------------|---------|---------------------------------------------------------------------------------------------------------------------------------------------------------------------------------------------------------------------------------------------------------------------------------------------------------------------------------------------------------------------------------------------------------------------|----------------------------------------------------------------------------------------------------------------------------------------------------------------------------------------------------------------------------------------------------------------------------------------------------------------------------------------------------------------------------------|--------------------|
|                        |         |                                                                                                                                                                                                                                                                                                                                                                                                                     | <b>nut-8.6</b> Report on the validity of the dietary or nutritional assessment methods and any internal or external validation used in the study, if applicable.                                                                                                                                                                                                                 |                    |
| Bias                   | 9       | Describe any efforts to address potential sources of bias.                                                                                                                                                                                                                                                                                                                                                          | <b>nut-9</b> Report how bias in dietary or nutritional assessment was addressed, e.g., misreporting, changes in habits as a result of being measured, or data imputation from other sources                                                                                                                                                                                      | 22-23              |
| Study Size             | 10      | Explain how the study size was arrived at.                                                                                                                                                                                                                                                                                                                                                                          |                                                                                                                                                                                                                                                                                                                                                                                  | 12                 |
| Quantitative variables | 11      | Explain how quantitative variables were handled in the analyses. If applicable, describe which groupings were chosen and why.                                                                                                                                                                                                                                                                                       | <b>nut-11</b> Explain categorization of dietary/nutritional data (e.g., use of N-tiles and handling of nonconsumers) and the choice of reference category, if applicable.                                                                                                                                                                                                        |                    |
| Statistical Methods    | 12      | <p>(a) Describe all statistical methods, including those used to control for confounding</p> <p>(b) Describe any methods used to examine subgroups and interactions.</p> <p>(c) Explain how missing data were addressed.</p> <p>(d) Cohort study—If applicable, explain how loss to follow-up was addressed.</p> <p>Case-control study—If applicable, explain how matching of cases and controls was addressed.</p> | <p><b>nut-12.1</b> Describe any statistical method used to combine dietary or nutritional data, if applicable.</p> <p><b>nut-12.2</b> Describe and justify the method for energy adjustments, intake modeling, and use of weighting factors, if applicable.</p> <p><b>nut-12.3</b> Report any adjustments for measurement error, i.e., from a validity or calibration study.</p> | 22-24              |



| Item             | Item nr | STROBE recommendations                                                                                                                                                                                                                                                                                                              | Extension for Nutritional Epidemiology studies (STROBE-nut)                                                                                                                                                    | Reported on page # |
|------------------|---------|-------------------------------------------------------------------------------------------------------------------------------------------------------------------------------------------------------------------------------------------------------------------------------------------------------------------------------------|----------------------------------------------------------------------------------------------------------------------------------------------------------------------------------------------------------------|--------------------|
|                  |         | <p>Cross-sectional study—If applicable, describe analytical methods taking account of sampling strategy.</p> <p>(e) Describe any sensitivity analyses.</p>                                                                                                                                                                          |                                                                                                                                                                                                                |                    |
| <b>Results</b>   |         |                                                                                                                                                                                                                                                                                                                                     |                                                                                                                                                                                                                |                    |
| Participants     | 13      | <p>(a) Report the numbers of individuals at each stage of the study—e.g., numbers potentially eligible, examined for eligibility, confirmed eligible, included in the study, completing follow-up, and analyzed.</p> <p>(b) Give reasons for non-participation at each stage.</p> <p>(c) Consider use of a flow diagram.</p>        | <b>nut-13</b> Report the number of individuals excluded based on missing, incomplete or implausible dietary/nutritional data.                                                                                  | N/A                |
| Descriptive data | 14      | <p>(a) Give characteristics of study participants (e.g., demographic, clinical, social) and information on exposures and potential confounders</p> <p>(b) Indicate the number of participants with missing data for each variable of interest</p> <p>(c) Cohort study—Summarize follow-up time (e.g., average and total amount)</p> | <b>nut-14</b> Give the distribution of participant characteristics across the exposure variables if applicable. Specify if food consumption of total population or consumers only were used to obtain results. | 25                 |

| Item              | Item nr | STROBE recommendations                                                                                                                                                                                                                                                                                                                                                                                                                   | Extension for Nutritional Epidemiology studies (STROBE-nut)                                                                     | Reported on page # |
|-------------------|---------|------------------------------------------------------------------------------------------------------------------------------------------------------------------------------------------------------------------------------------------------------------------------------------------------------------------------------------------------------------------------------------------------------------------------------------------|---------------------------------------------------------------------------------------------------------------------------------|--------------------|
| Outcome data      | 15      | <p>Cohort study—Report numbers of outcome events or summary measures over time.</p> <p>Case-control study—Report numbers in each exposure category, or summary measures of exposure.</p> <p>Cross-sectional study—Report numbers of outcome events or summary measures.</p>                                                                                                                                                              |                                                                                                                                 | 27                 |
| Main results      | 16      | <p>(a) Give unadjusted estimates and, if applicable, confounder-adjusted estimates and their precision (e.g., 95% confidence interval).</p> <p>Make clear which confounders were adjusted for and why they were included.</p> <p>(b) Report category boundaries when continuous variables were categorized.</p> <p>(c) If relevant, consider translating estimates of relative risk into absolute risk for a meaningful time period.</p> | <b>nut-16</b> Specify if nutrient intakes are reported with or without inclusion of dietary supplement intake, if applicable.   | N/A                |
| Other analyses    | 17      | Report other analyses done—e.g., analyses of subgroups and interactions and sensitivity analyses.                                                                                                                                                                                                                                                                                                                                        | <b>nut-17</b> Report any sensitivity analysis (e.g., exclusion of misreporters or outliers) and data imputation, if applicable. | N/A                |
| <b>Discussion</b> |         |                                                                                                                                                                                                                                                                                                                                                                                                                                          |                                                                                                                                 |                    |

| Item                          | Item nr | STROBE recommendations                                                                                                                                                      | Extension for Nutritional Epidemiology studies (STROBE-nut)                                                                                          | Reported on page # |
|-------------------------------|---------|-----------------------------------------------------------------------------------------------------------------------------------------------------------------------------|------------------------------------------------------------------------------------------------------------------------------------------------------|--------------------|
| Key results                   | 18      | Summarize key results with reference to study objectives.                                                                                                                   |                                                                                                                                                      | 35-36              |
| Limitation                    | 19      | Discuss limitations of the study, taking into account sources of potential bias or imprecision. Discuss both direction and magnitude of any potential bias.                 | <b>nut-19</b> Describe the main limitations of the data sources and assessment methods used and implications for the interpretation of the findings. | 40-41              |
| Interpretation                | 20      | Give a cautious overall interpretation of results considering objectives, limitations, multiplicity of analyses, results from similar studies, and other relevant evidence. | <b>nut-20</b> Report the nutritional relevance of the findings, given the complexity of diet or nutrition as an exposure.                            | 36-39              |
| Generalizability              | 21      | Discuss the generalizability (external validity) of the study results.                                                                                                      |                                                                                                                                                      | 40                 |
| <b>Other information</b>      |         |                                                                                                                                                                             |                                                                                                                                                      |                    |
| Funding                       | 22      | Give the source of funding and the role of the funders for the present study and, if applicable, for the original study on which the present article is based.              |                                                                                                                                                      | 2                  |
| <i>Ethics</i>                 |         |                                                                                                                                                                             | <b>nut-22.1</b> Describe the procedure for consent and study approval from ethics committee(s).                                                      | 11                 |
| <i>Supplementary material</i> |         |                                                                                                                                                                             | <b>nut-22.2</b> Provide data collection tools and data as online material or explain how they can be accessed.                                       | 16-21              |

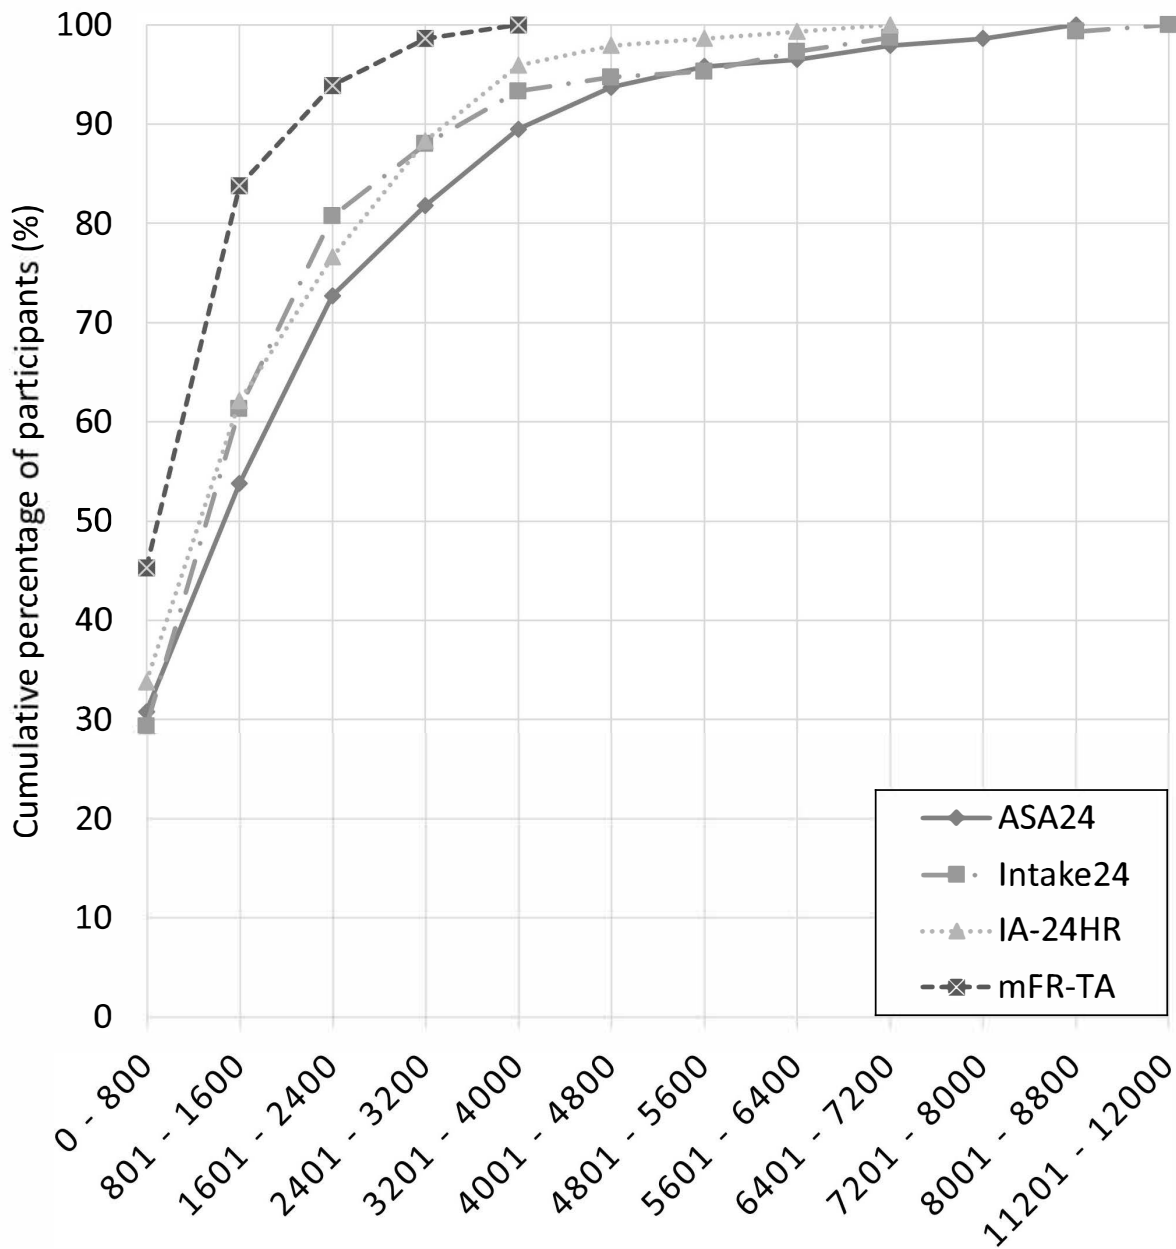

**Supplemental figure 1.** Cumulative percentage of participants within increments of energy intake estimation error, by method, showing absolute difference between observed and estimated energy intake (kJ).

**Supplemental figure 2.** Bland Altman scatterplots of percentage error in estimated carbohydrate intake against true carbohydrate intake, showing mean difference (solid lines). A, ASA24-Australia; B, Intake24-Australia; C, mFR-TA; D, IA-24HR.

**Supplemental figure 3.** Bland Altman scatterplots of percentage error in estimated protein intake against true protein intake, showing mean difference (solid lines). A, ASA24-Australia; B, Intake24-Australia; C, mFR-TA; D, IA-24HR.

**Supplemental figure 4.** Bland Altman scatterplots of percentage error in estimated total fat intake against true total fat intake, showing mean difference (solid lines). A, ASA24-Australia; B, Intake24-Australia; C, mFR-TA; D, IA-24HR.

**Abbreviations:**

ASA24 - Automated Self-Administered Dietary Assessment Tool-Australia

Intake24-Australia

mFR-TA - mobile Food Record – Trained Analyst

IA-24HR mage - Assisted Interviewer-Administered 24-hour recall

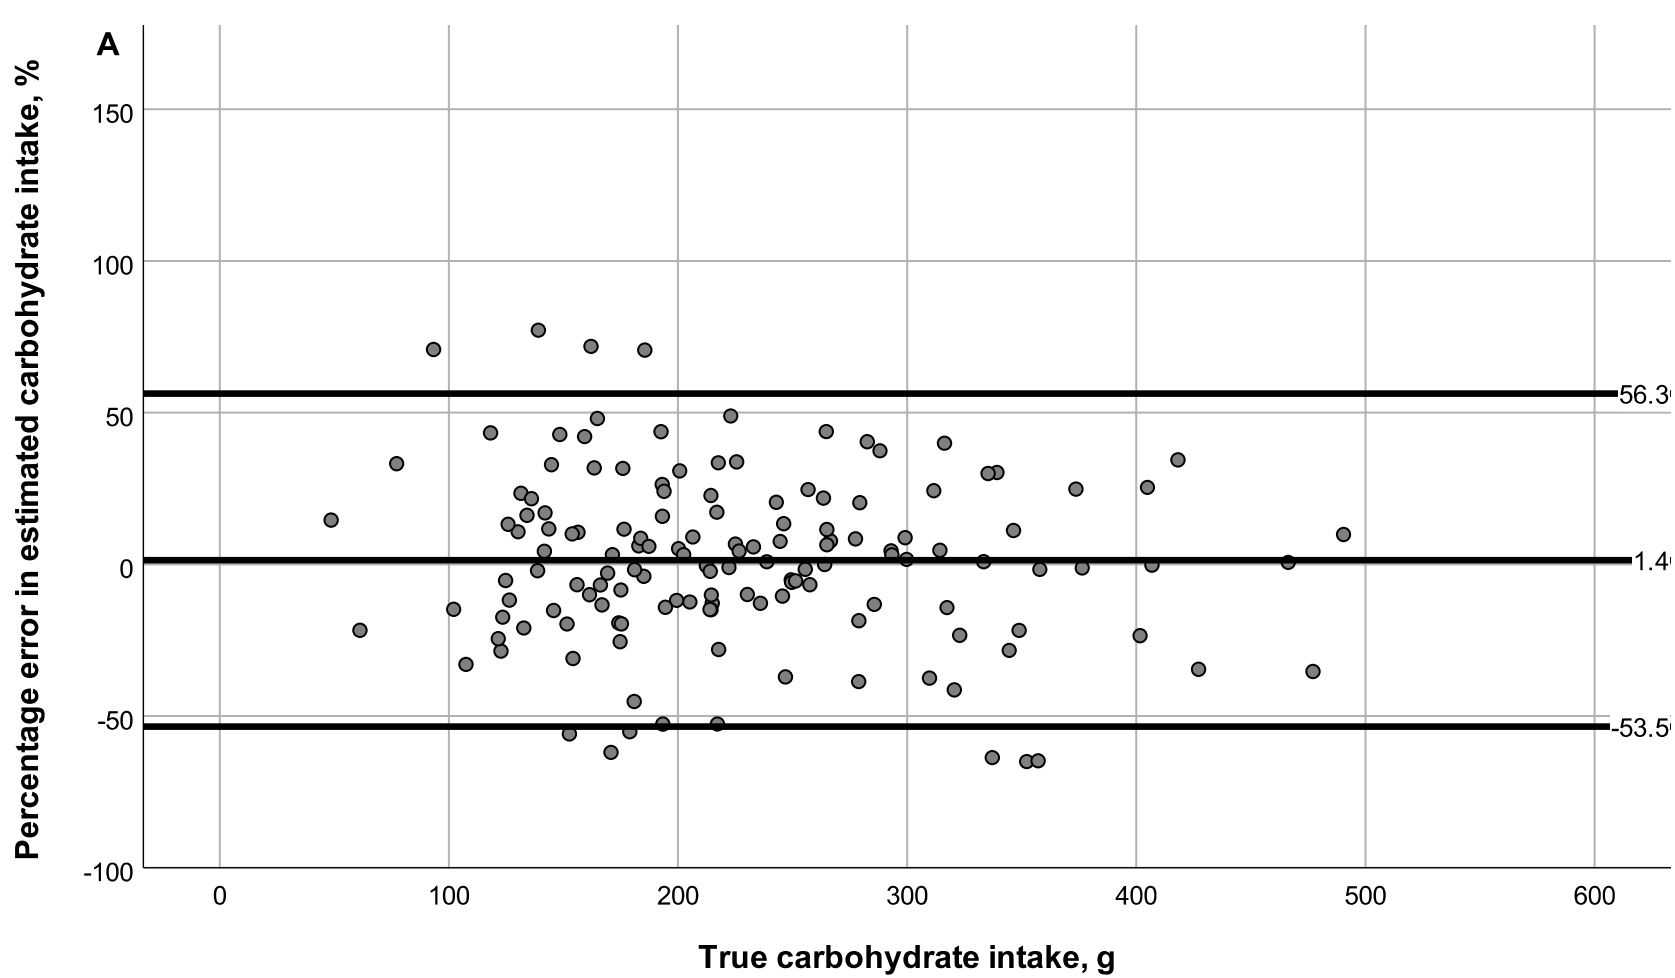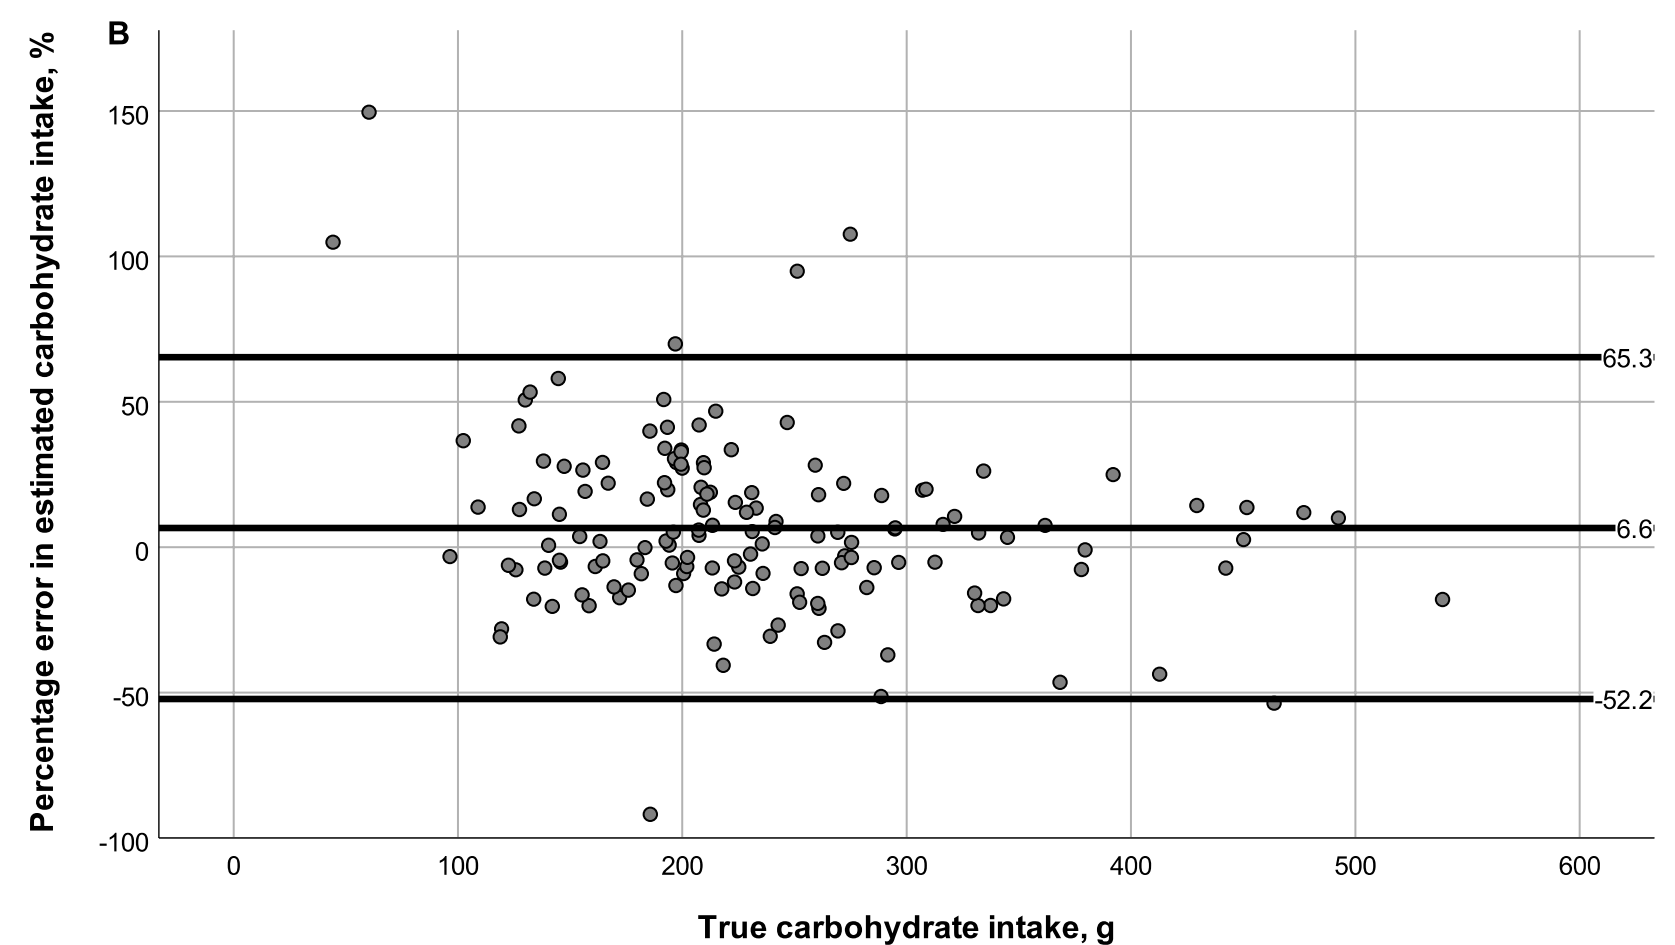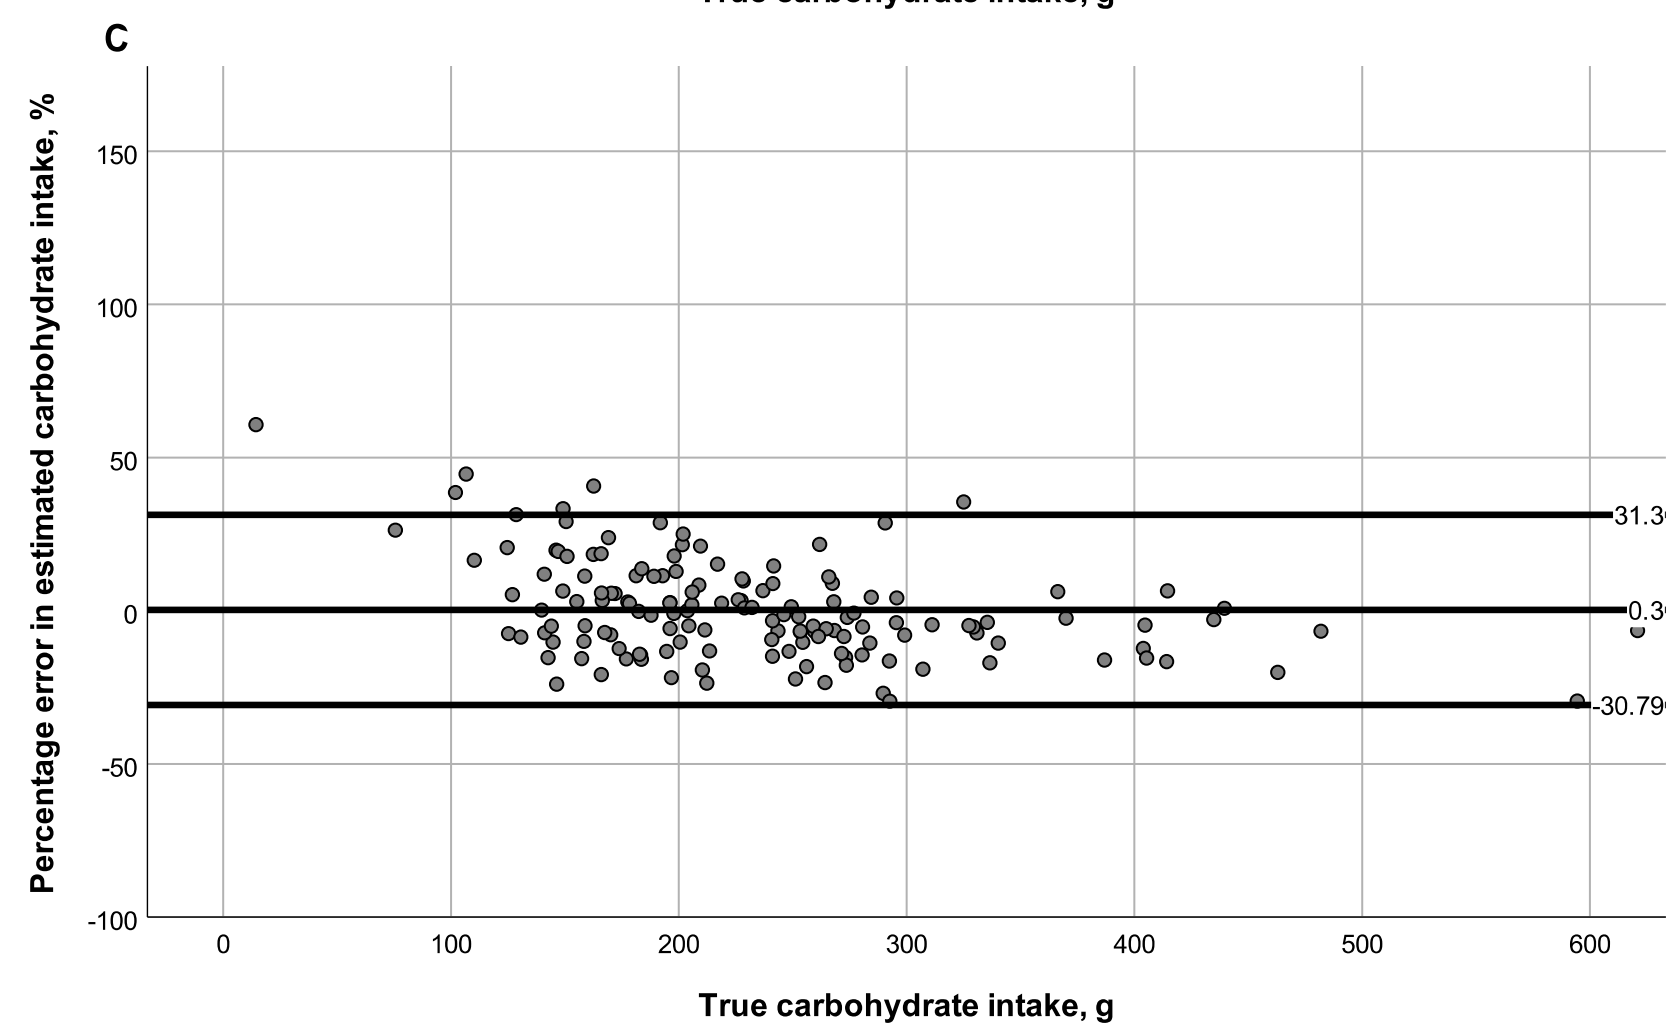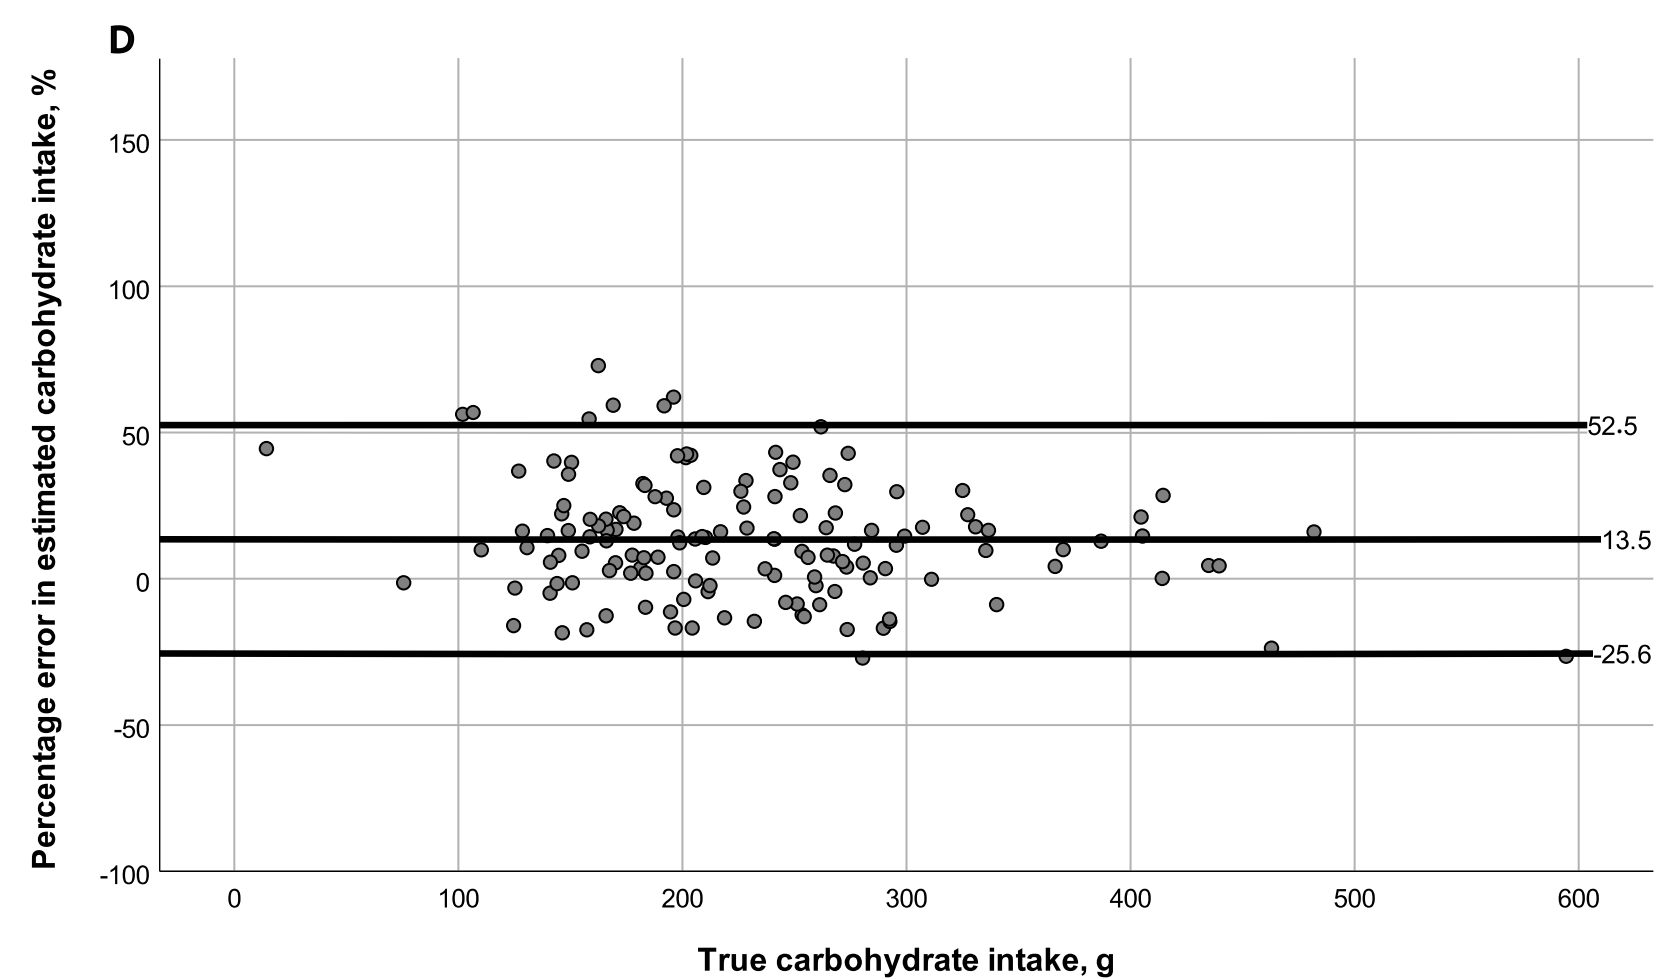

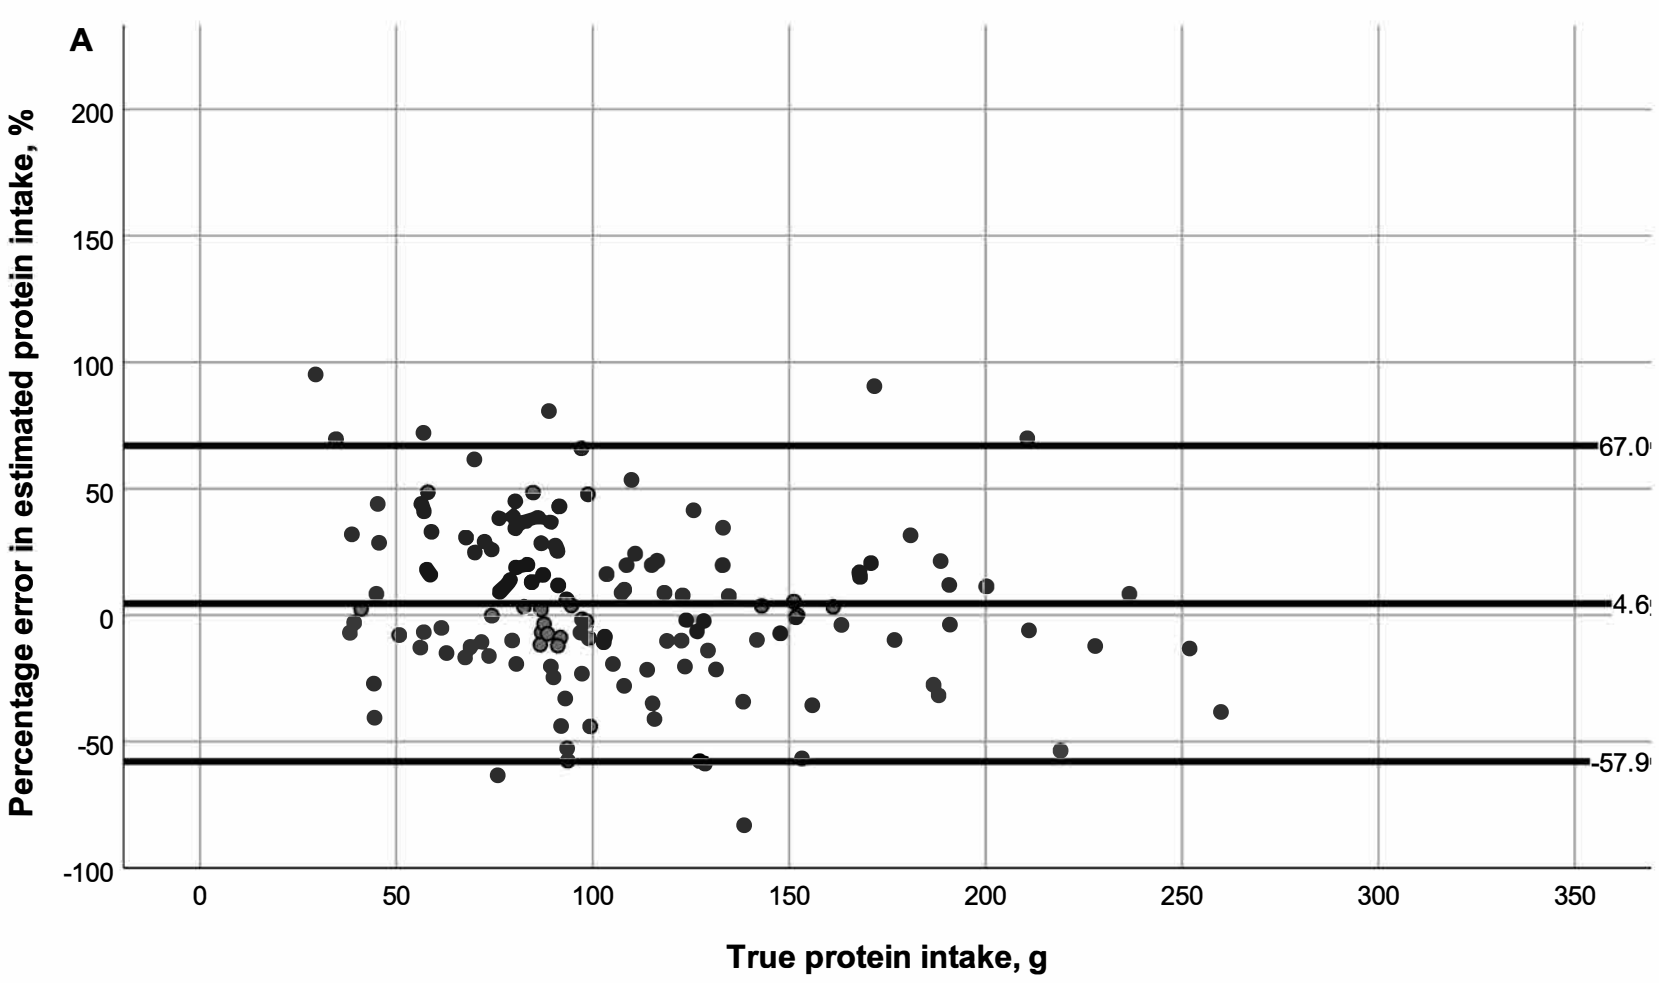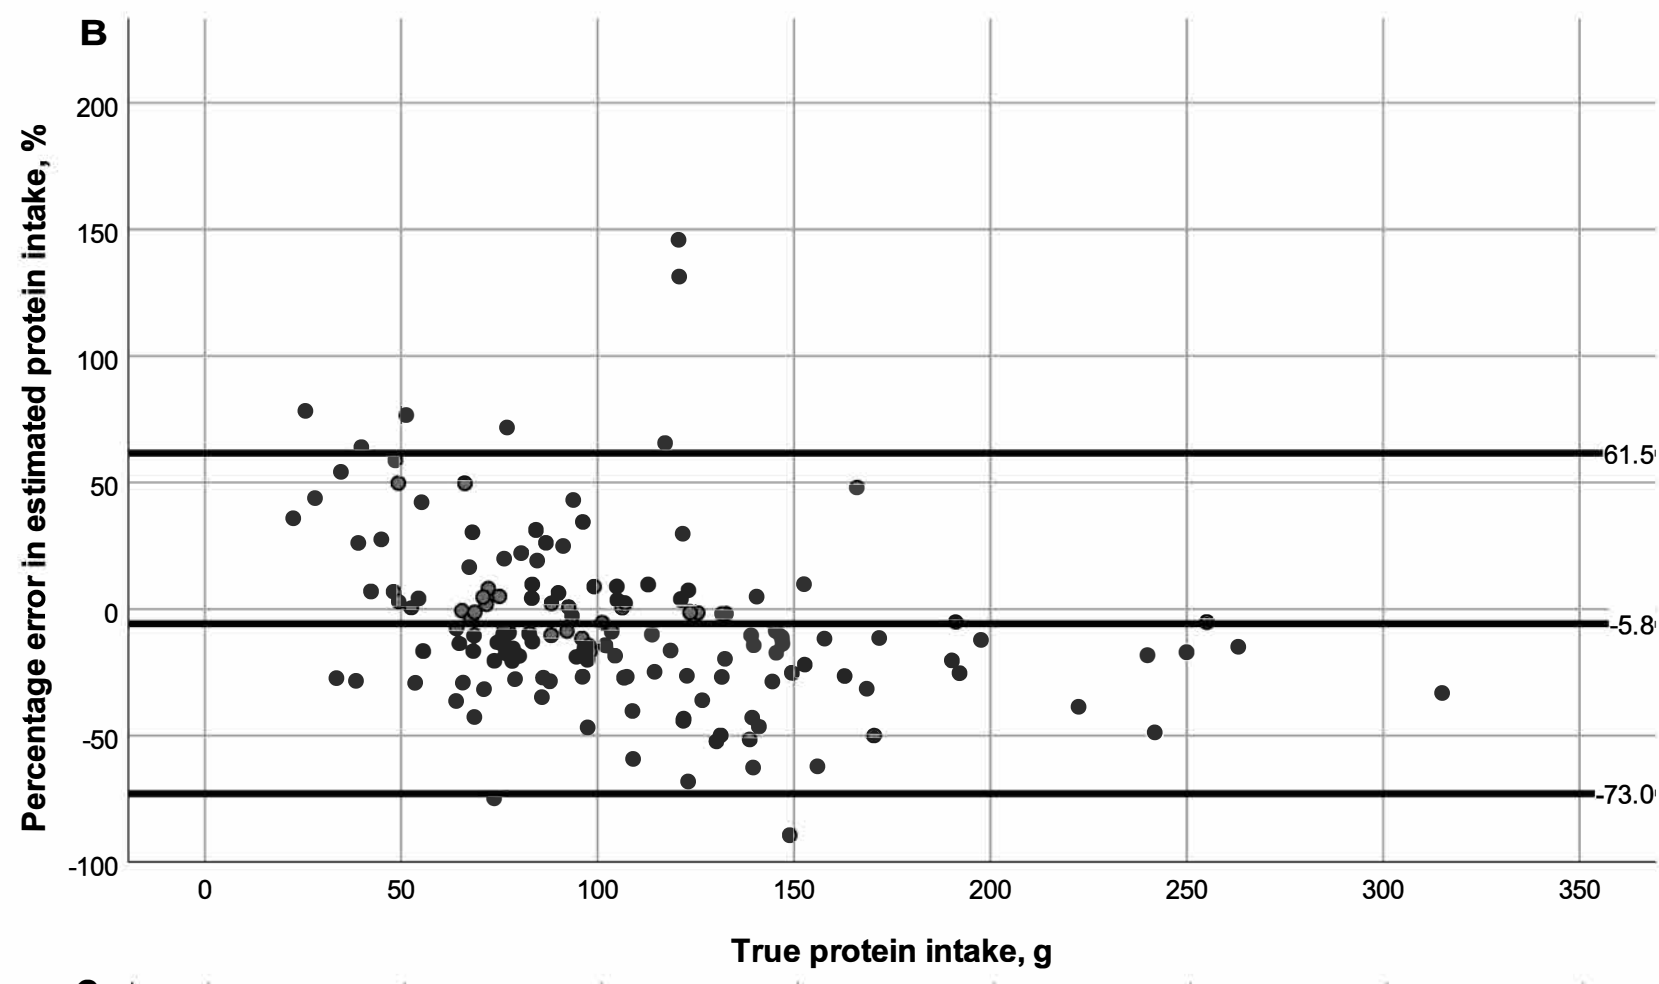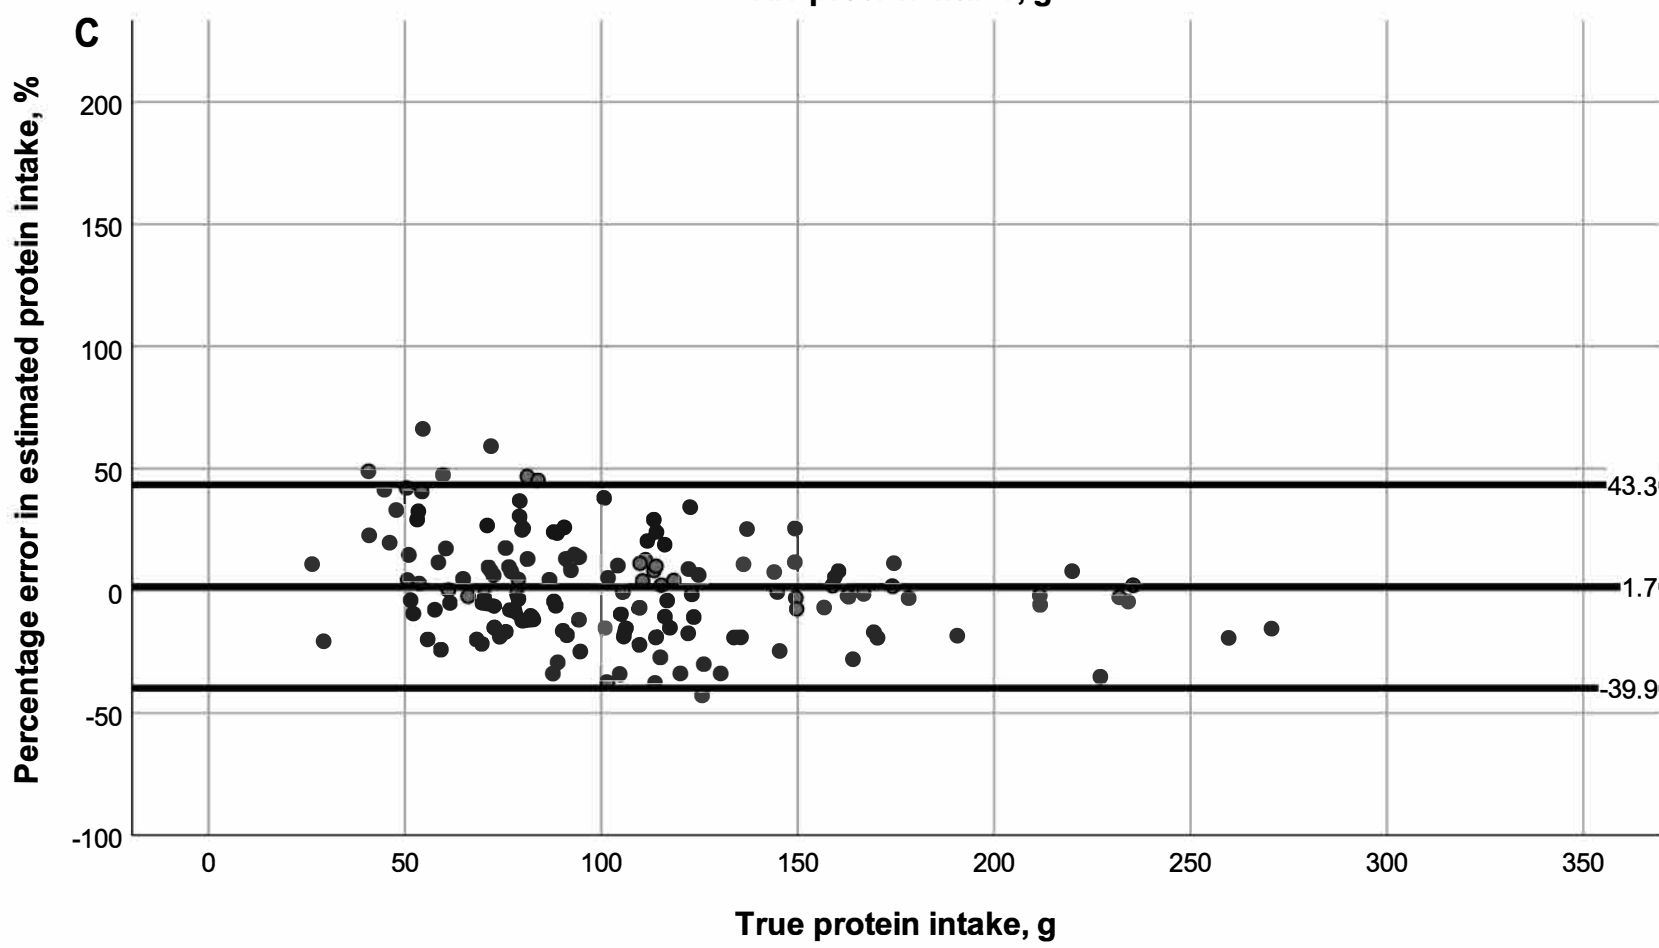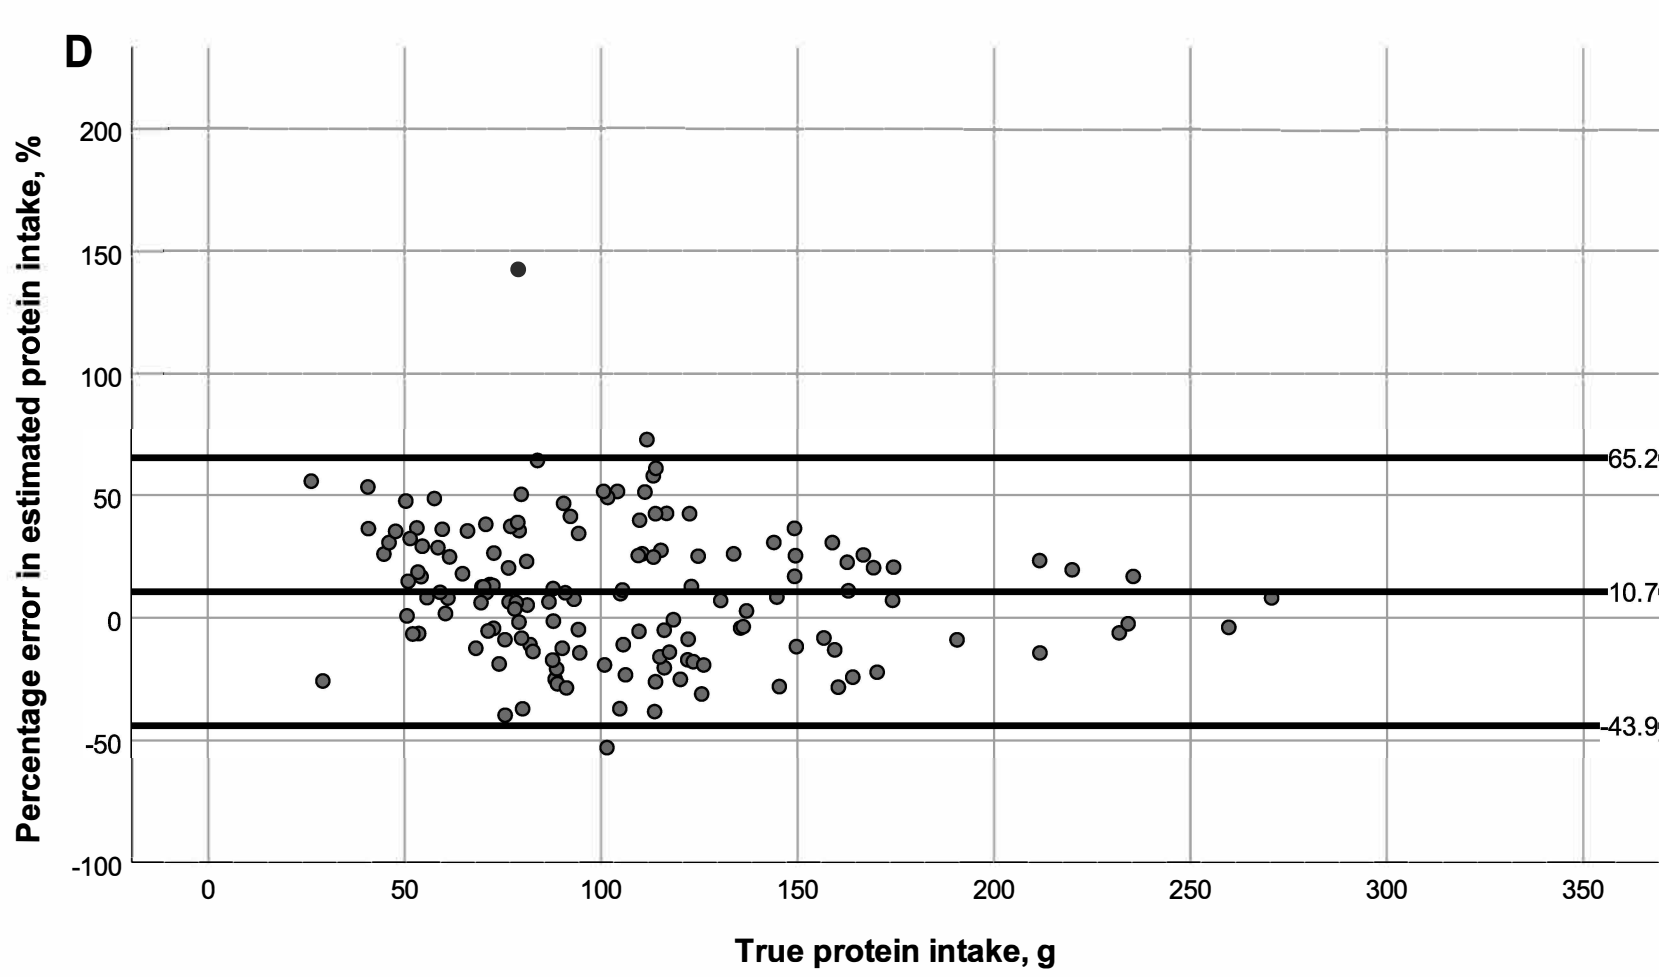

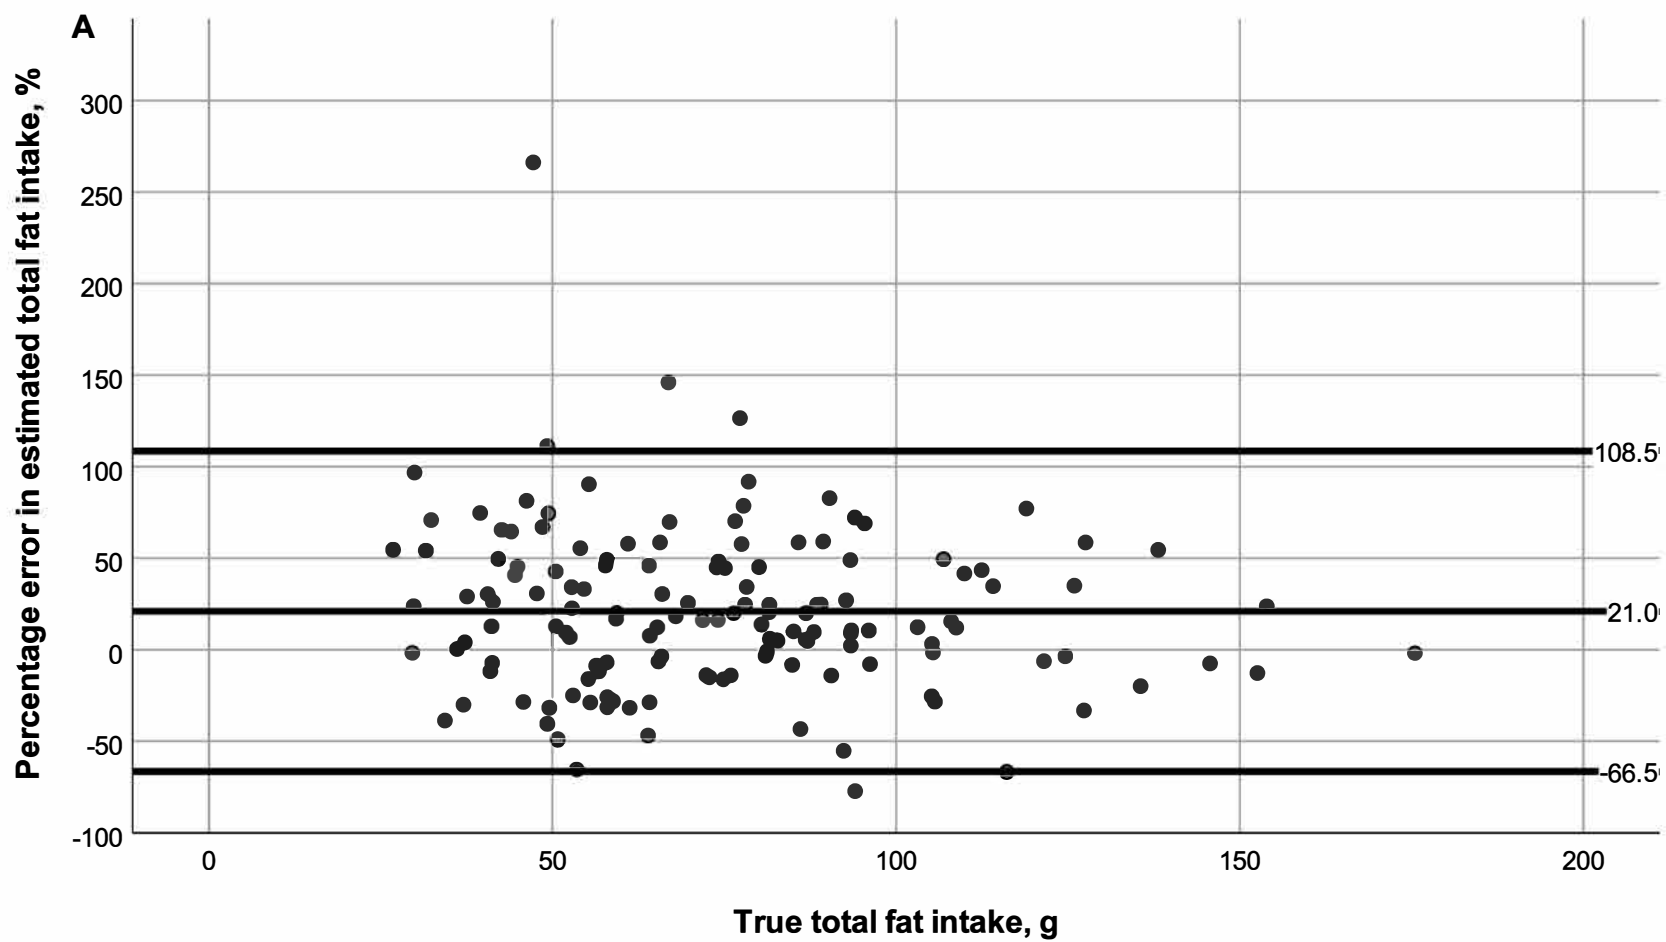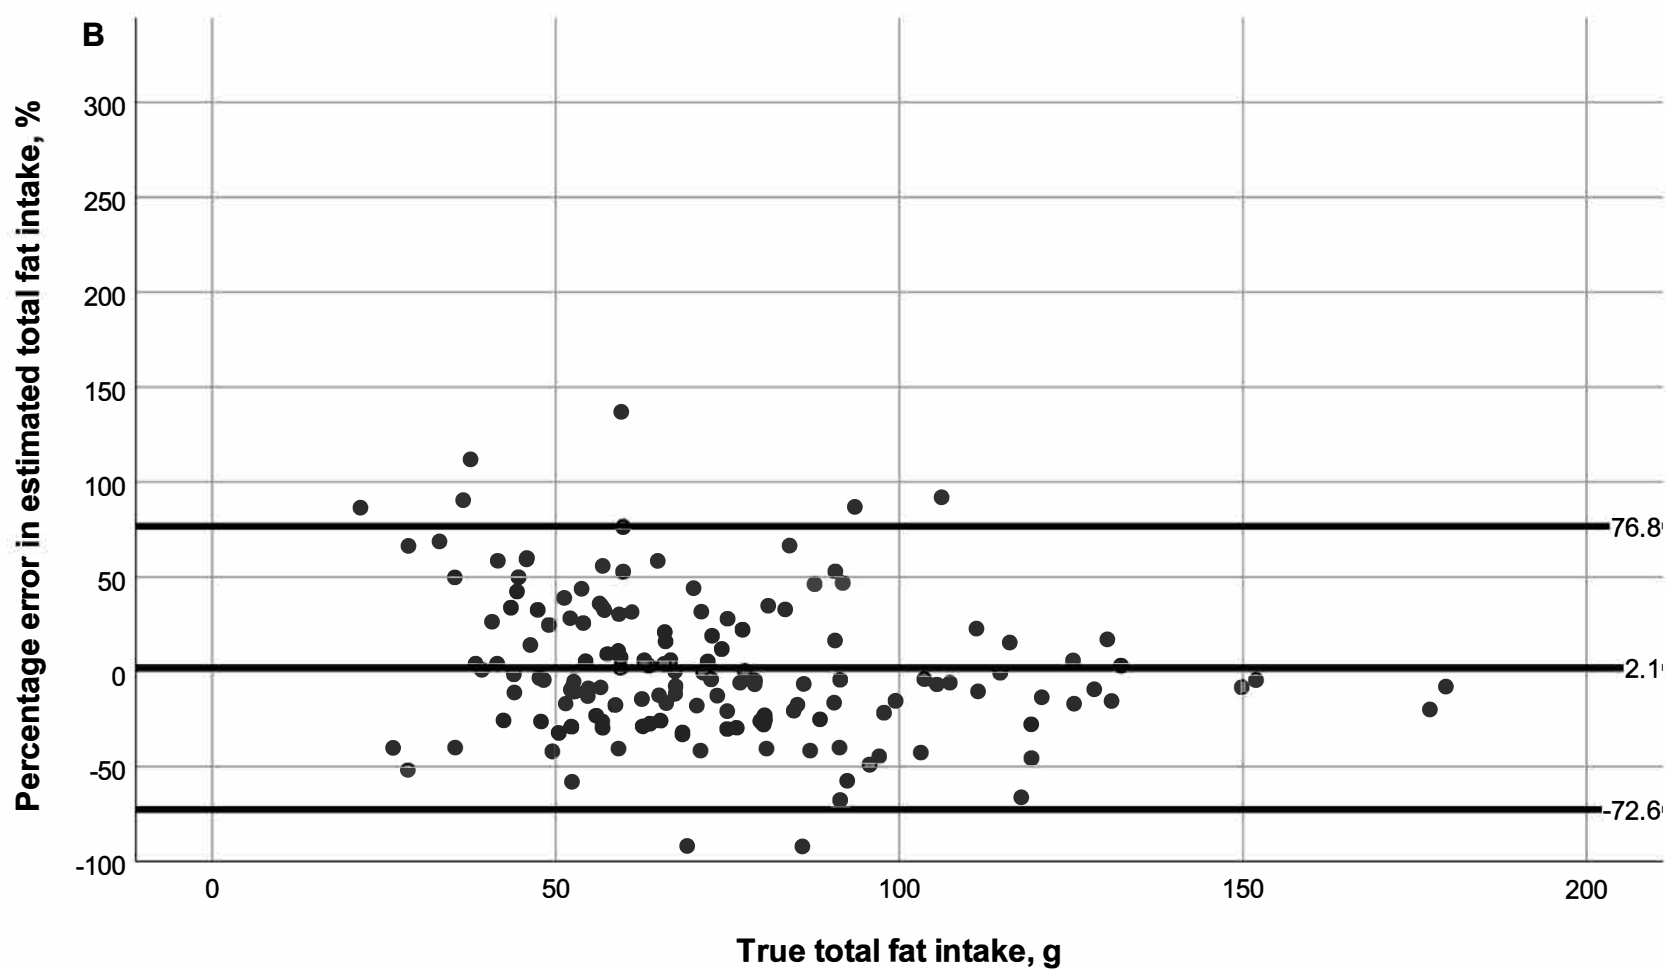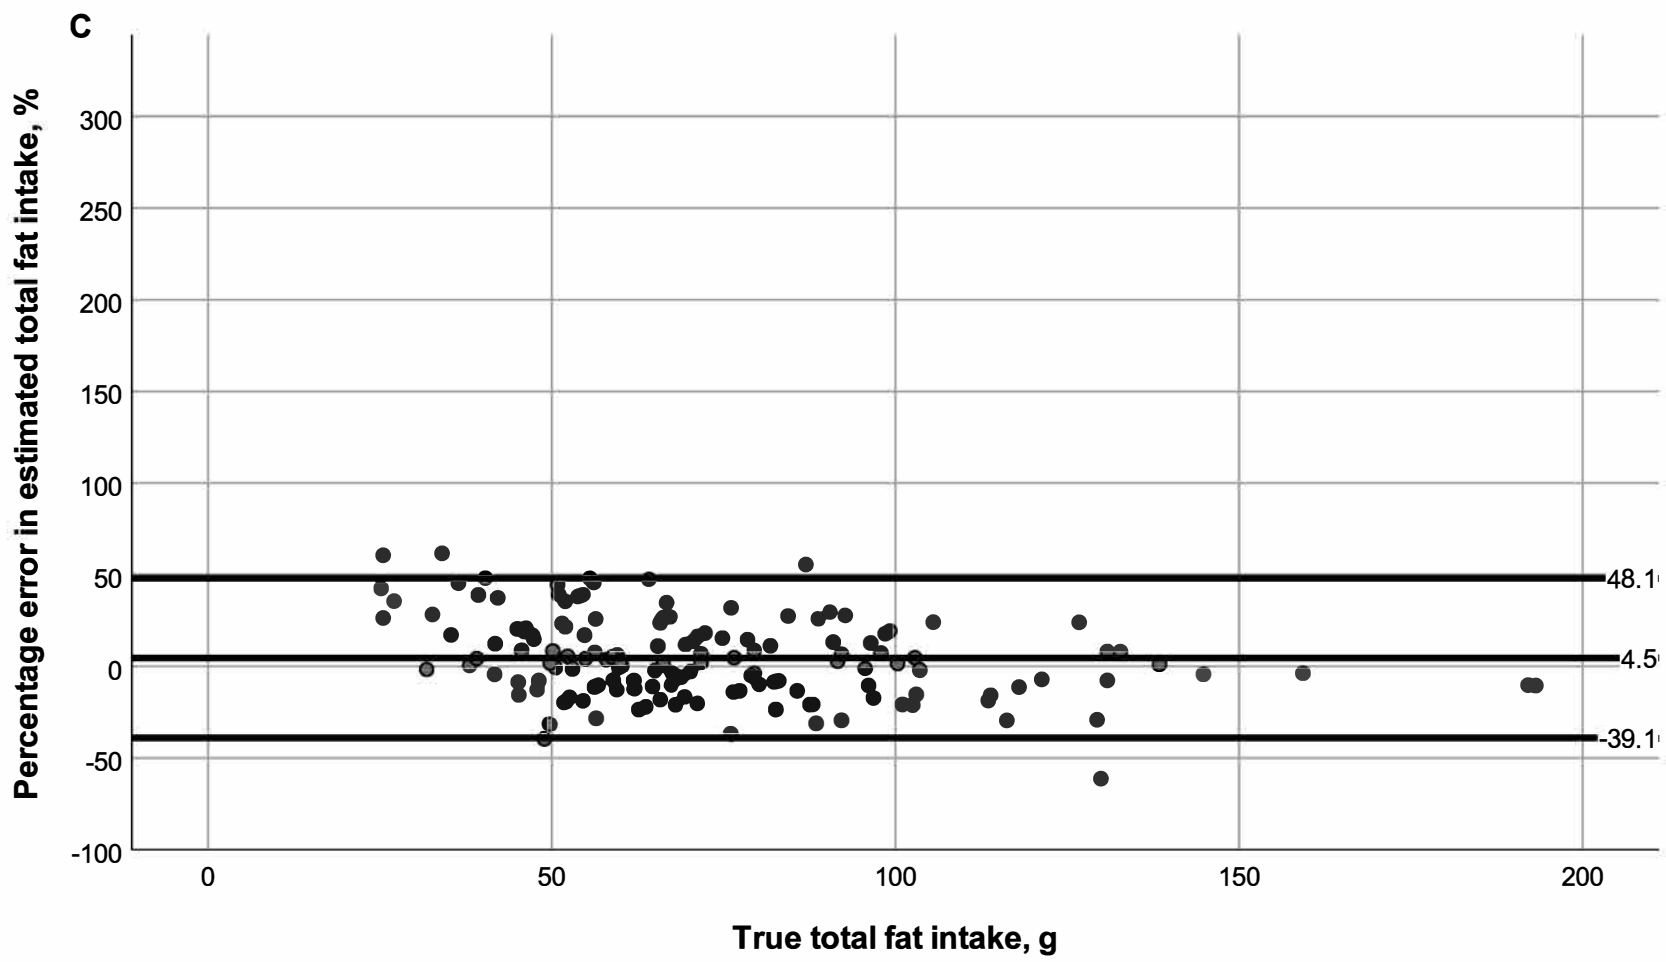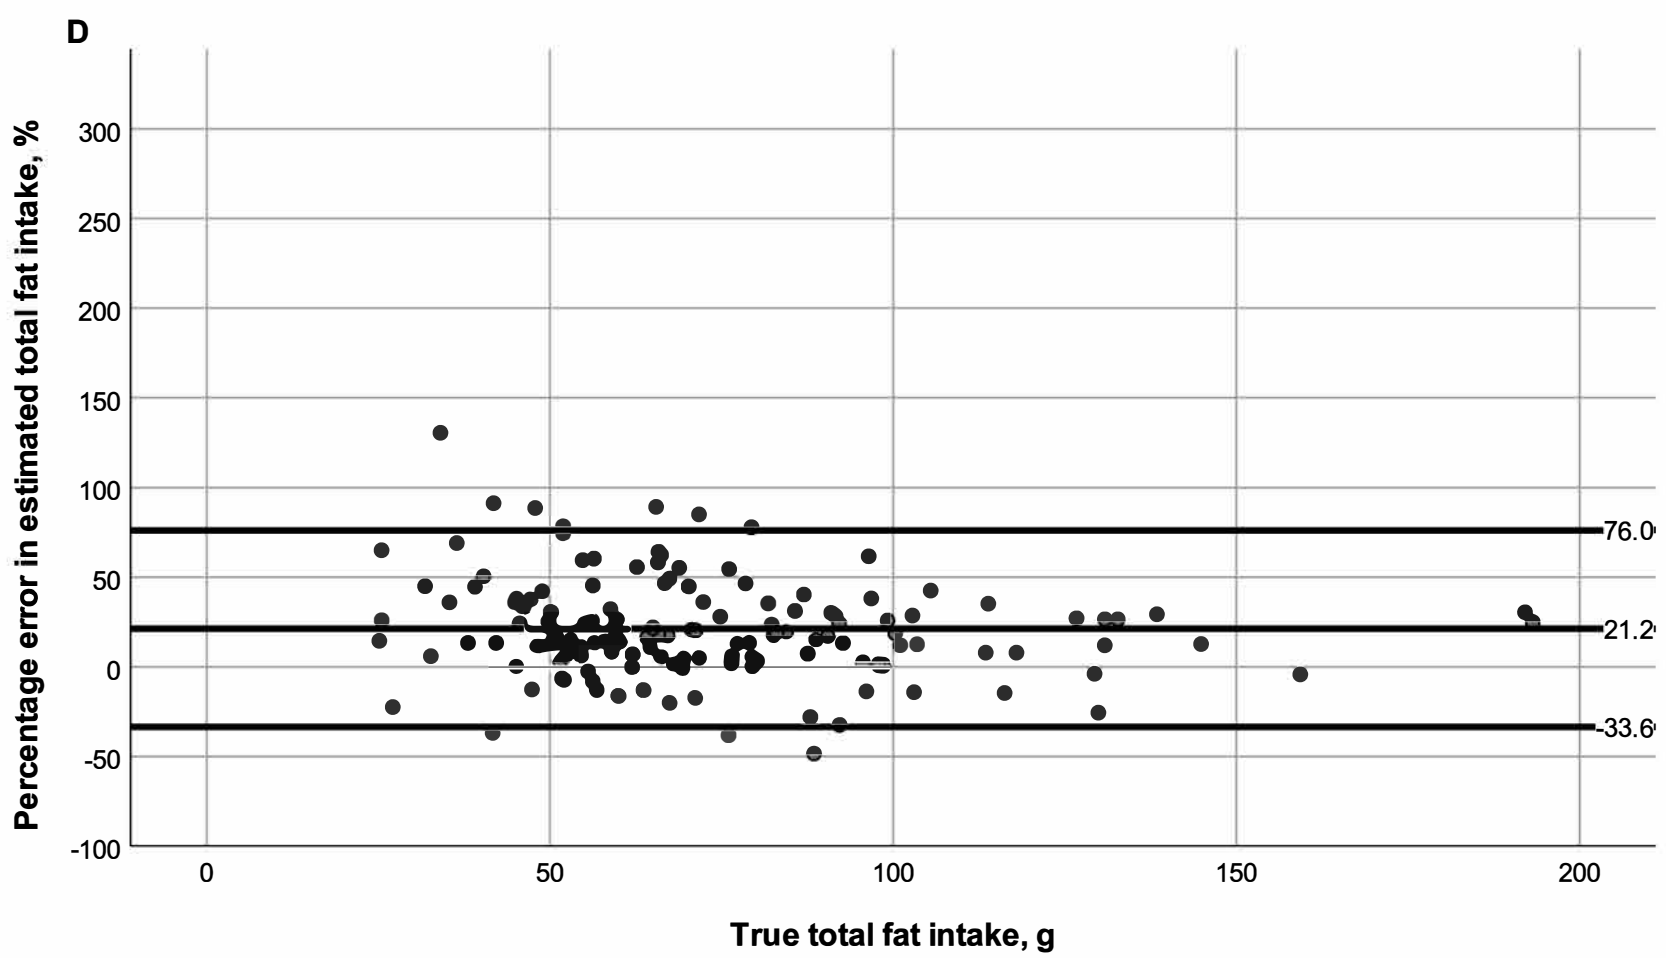

Supplement: mmc1.pdf [file mmc1.pdf]
